# Supplementary material for: Benchmarking causal reasoning algorithms for gene expression-based compound mechanism of action analysis
Source: Research Square preprint supplement (doi:10.21203/rs.3.rs-1239049/v1), 2022-01-19
Supplement: Supplementary file 1 [file cdc76a70fd263bd311b41b83.xlsx]

## Sheet: test_set_compound_data_both_cel
pert_iname	ChEMBL_Targets	LINCS_MoA	LINCS_Active_GeneName	LINCS_DA	LINCS_Indication	inchi_key				KEY
sulconazole	['O00255', 'P06241', 'P07900', 'P08173', 'P08912', 'P08913', 'P0DMS8', 'P11229', 'P14902', 'P18089', 'P18825', 'P20309', 'P21452', 'P23975', 'P24557', 'P28223', 'P28335', 'P28482', 'P31645', 'P35462', 'P41595', 'Q01959', 'Q03164', 'Q16637', 'Q16665', 'Q96RI1', 'Q9NUW8']	sterol demethylase inhibitor		infectious disease	tinea pedis, tinea cruris, tinea corporis	AFNXATANNDIXLG-UHFFFAOYSA-N				pert_iname	Compound name in LINCS pert_info.txt metadata
paroxetine	['P08172', 'P08173', 'P08912', 'P11229', 'P19838', 'P20309', 'P23975', 'P25103', 'P31645', 'P42345', 'Q01959', 'Q12809', 'Q99571', 'Q99720']	selective serotonin reuptake inhibitor (SSRI)	CHRM1, CHRM2, CHRM3, CHRM4, CHRM5, HTR2A, SLC6A2, SLC6A4	neurology/psychiatry	depression, obsessive compulsive disorder (OCD), generalized anxiety disorder (GAD), panic disorders, posttraumatic stress disorder, social anxiety disorder	AHOUBRCZNHFOSL-YOEHRIQHSA-N				ChEMBL_Targets	Targets (pChEMBL>=5) as UniProtIDs
doxorubicin	['B2RXH2', 'O00255', 'O14965', 'O15118', 'O75604', 'P04626', 'P06241', 'P06746', 'P07900', 'P08183', 'P08238', 'P08253', 'P10636', 'P11229', 'P11388', 'P26447', 'P38398', 'P42226', 'P51151', 'Q03164', 'Q06710', 'Q15125', 'Q16637', 'Q16665', 'Q6W5P4', 'Q99814', 'Q9UBM7']	topoisomerase inhibitor	TOP2A	hematologic malignancy, oncology	acute lymphoblastic leukemia (ALL), acute myeloid leukemia (AML), Wilm's tumor, breast cancer, ovarian cancer, Hodgkin's lymphoma, bladder cancer, multiple myeloma	AOJJSUZBOXZQNB-TZSSRYMLSA-N				LINCS_MoA	MoA class from clue.io
propranolol	['P07550', 'P08588', 'P08908', 'P13945', 'P28223', 'P28335', 'P28482', 'P31645', 'P41595', 'P50406', 'Q14524', 'Q14973', 'Q99720']	adrenergic receptor antagonist		cardiology, neurology/psychiatry	hypertension, angina pectoris, migraine headache	AQHHHDLHHXJYJD-UHFFFAOYSA-N				LINCS_Active_GeneName	Targets from clue.io
riboflavin	['P00352', 'P38398', 'Q9NUW8']	vitamin B2	BLVRB, RFK	gastroenterology	jaundice	AUNGANRZJHBGPY-SCRDCRAPSA-N				LINCS_DA	Disease area from clue.io
H-7	['P42858']					BDVFVCGFMNCYPV-UHFFFAOYSA-N				LINCS_Indication	Indication from clue.io
suloctidil	['P00352']	adrenergic receptor antagonist				BFCDFTHTSVTWOG-UHFFFAOYSA-N				inchi_key	Compound InChI Key
lysergol	['O75604', 'Q96RJ0']					BIXJFIJYBLJTMK-MEBBXXQBSA-N
yohimbine	['P08913', 'P0DMS8', 'P10828', 'P14416', 'P18089', 'P18825', 'P25100', 'P35348', 'P35368', 'P41595', 'P50406']	adrenergic receptor antagonist	ADRA2A, ADRA2B, ADRA2C, DRD2, DRD3, HTR1A, HTR1B, HTR1D, HTR1E, HTR1F, HTR2A, HTR2B, HTR2C, HTR5A, HTR7, KCNJ1, KCNJ10, KCNJ11, KCNJ12, KCNJ14, KCNJ15, KCNJ8	cardiology	cardiac arrythmia, bradycardia	BLGXFZZNTVWLAY-SCYLSFHTSA-N
terconazole	['P07900', 'P08172', 'P08173', 'P08912', 'P08913', 'P11229', 'P18089', 'P18825', 'P20309', 'P28223', 'P28335', 'P31645', 'P35462', 'Q01959', 'Q99720']	sterol demethylase inhibitor		infectious disease	vulvovaginal candidiasis	BLSQLHNBWJLIBQ-OZXSUGGESA-N
xylazine	['P02545', 'P10636', 'P51151', 'P54132']	adrenergic receptor agonist	ADRA2A, ADRA2B, ADRA2C	neurology/psychiatry	anesthetic	BPICBUSOMSTKRF-UHFFFAOYSA-N
etamivan	['P54132']					BQJODPIMMWWMFC-UHFFFAOYSA-N
piperacetazine	['O75604']	dopamine receptor antagonist		neurology/psychiatry	schizophrenia	BTFMCMVEUCGQDX-UHFFFAOYSA-N
protriptyline	['P02545', 'P04637', 'P0DMS8', 'P19838', 'P23975', 'P40225', 'Q16637']	tricyclic antidepressant	SLC6A2, SLC6A4	neurology/psychiatry	depression	BWPIARFWQZKAIA-UHFFFAOYSA-N
pentoxifylline	['P02545', 'P22303', 'P29275', 'Q16637']	phosphodiesterase inhibitor	ADORA1, ADORA2A, ADORA2B, ADRA2B, NT5E, PDE10A, PDE1A, PDE1B, PDE1C, PDE2A, PDE3A, PDE3B, PDE4A, PDE4B, PDE4C, PDE4D, PDE5A, PDE6A, PDE6B, PDE6C, PDE6D, PDE6G, PDE6H, PDE7A, PDE7B, PDE8A, PDE8B, PDE9A, TNF	cardiology	claudication	BYPFEZZEUUWMEJ-UHFFFAOYSA-N
SB-203580	['O00238', 'O14578', 'O14976', 'O15197', 'O15264', 'O43353', 'O60331', 'O95819', 'P00519', 'P00533', 'P04049', 'P06239', 'P08581', 'P09917', 'P11229', 'P12931', 'P15056', 'P23219', 'P24557', 'P29274', 'P29323', 'P29597', 'P30542', 'P33981', 'P35916', 'P36507', 'P36896', 'P37173', 'P42681', 'P42685', 'P45983', 'P45984', 'P47871', 'P48729', 'P48730', 'P49674', 'P49841', 'P53778', 'P53779', 'Q08345'…	p38 MAPK inhibitor	AKT1, ALOX5, CHEK1, CYP2D6, CYP3A4, GAK, GSK3B, LCK, MAPK1, MAPK10, MAPK11, MAPK12, MAPK14, MAPK8, MAPK9, PRKCA, RAF1, RIPK2, ROCK1, RPS6KB1, SGK1, SRC, TNF			CDMGBJANTYXAIV-UHFFFAOYSA-N
ethisterone	['P02545', 'P04150', 'P04278', 'Q16637']	progestogen hormone	TYR			CHNXZKVNWQUJIB-CEGNMAFCSA-N
fluvoxamine	['P02545', 'P54132', 'Q01959', 'Q16637', 'Q99720']	selective serotonin reuptake inhibitor (SSRI)	SLC6A4	neurology/psychiatry	obsessive compulsive disorder (OCD)	CJOFXWAVKWHTFT-XSFVSMFZSA-N
oxybuprocaine	['Q16665']	local anesthetic	SCN10A	neurology/psychiatry	local anesthetic	CMHHMUWAYWTMGS-UHFFFAOYSA-N
naproxen	['P02545', 'P16473', 'P23219', 'P42330', 'Q4U2R8']	cyclooxygenase inhibitor	PTGS1, PTGS2	neurology/psychiatry, rheumatology, dental, otolaryngology, endocrinology	pain relief, rheumatoid arthritis, headache, toothache, backache, muscle pain, common cold, fever	CMWTZPSULFXXJA-VIFPVBQESA-N
phenacetin	['O00255', 'Q03164']	cyclooxygenase inhibitor	PTGS1			CPJSUEIXXCENMM-UHFFFAOYSA-N
rilmenidine	['P06746', 'P08913', 'P18089', 'P18825', 'P19838', 'P35348', 'Q9Y2I1']	adrenergic receptor agonist, imidazoline receptor agonist	ADRA2A	cardiology	hypertension	CQXADFVORZEARL-UHFFFAOYSA-N
ellipticine	['O75496', 'P06746', 'P10721', 'P11388', 'P15428', 'P19838', 'P27695', 'P28482', 'P40225', 'P54132', 'Q01453', 'Q16637', 'Q16665', 'Q6W5P4']					CTSPAMFJBXKSOY-UHFFFAOYSA-N
pentylenetetrazol	['P10636', 'P54132']	GABA receptor antagonist				CWRVKFFCRWGWCS-UHFFFAOYSA-N
perhexiline	['O00255', 'P00533', 'P02545', 'P06241', 'P08173', 'P08912', 'P10636', 'P11229', 'P20309', 'P23975', 'Q03164', 'Q12809', 'Q16637', 'Q99720', 'Q9Y2T6']	carnitine palmitoyltransferase inhibitor	CPT1A, CPT2	cardiology	angina pectoris	CYXKNKQEMFBLER-UHFFFAOYSA-N
probenecid	['O43570', 'P00918', 'P51151', 'Q16637', 'Q16790', 'Q4U2R8', 'Q8TCC7']	uricosuric blocker	PANX1, SLC22A11, SLC22A6, SLC22A8, SLCO1C1	nephrology, rheumatology	hyperuricemia, gout	DBABZHXKTCFAPX-UHFFFAOYSA-N
diclofenac	['O60218', 'P02766', 'P10145', 'P23219', 'P25024', 'P35354', 'P42330', 'P54132', 'Q4U2R8']	cyclooxygenase inhibitor	AKR1C3, ALOX5, ASIC1, ASIC3, KCNQ2, KCNQ3, PLA2G2A, PPARG, PTGS1, PTGS2, SCN4A	rheumatology, neurology/psychiatry	rheumatoid arthritis, osteoarthritis, migraine headache	DCOPUUMXTXDBNB-UHFFFAOYSA-N
cisapride	['P04035', 'P08913', 'P14416', 'P18089', 'P18825', 'P21728', 'P25100', 'P28223', 'P28335', 'P31645', 'P35462', 'P41595', 'Q12809', 'Q13639', 'Q99720']	serotonin receptor agonist	HTR2A, HTR3A, HTR4, KCNH2			DCSUBABJRXZOMT-UHFFFAOYSA-N
vinpocetine	['P54132', 'Q16637', 'Q16665']	phosphodiesterase inhibitor, sodium channel blocker	PDE1A, PDE1C			DDNCQMVWWZOMLN-IRLDBZIGSA-N
dihydroergocristine	['P02545', 'P08913', 'P13945', 'P14416', 'P18089', 'P18825', 'P21728', 'P25100', 'P28223', 'P28335', 'P35372', 'P35462', 'P41595', 'P50406', 'Q03164', 'Q6W5P4']	adrenergic receptor antagonist, prolactin inhibitor	ADRA1A, ADRB1, DRD1, DRD2, DRD3, DRD4, DRD5, HTR1A, HTR2A, HTR3A, HTR4, HTR5A, HTR6, HTR7			DEQITUUQPICUMR-HJPBWRTMSA-N
cinnarizine	['P02545', 'P08173', 'P08912', 'P08913', 'P11229', 'P14416', 'P18089', 'P18825', 'P20309', 'P23975', 'P25100', 'P28223', 'P31645', 'P35367', 'P35372', 'P35462', 'P41595', 'Q01959', 'Q99720']					DERZBLKQOCDDDZ-JLHYYAGUSA-N
fusaric-acid	['P00352', 'P02545', 'P10636', 'P14618', 'P16050', 'P19838', 'P40225', 'P54132', 'Q16665', 'Q9Y468']					DGMPVYSXXIOGJY-UHFFFAOYSA-N
flecainide	['P02545', 'Q12809', 'Q14524', 'Q16637', 'Q6W5P4']	sodium channel blocker	KCNA5, KCNA7, SCN4A, SCN5A	cardiology	ventricular tachycardia (VT), atrial fibrillation (AF), ventricular arrhythmias	DJBNUMBKLMJRSA-UHFFFAOYSA-N
hexylcaine		sodium channel blocker	SCN10A, SCN5A	neurology/psychiatry	local anesthetic	DKLKMKYDWHYZTD-UHFFFAOYSA-N
amantadine	['P02545', 'P10828', 'P16473', 'P19838', 'P54132', 'Q05586', 'Q12879', 'Q99720']	glutamate receptor antagonist	DRD2, GRIN2A, GRIN2B, GRIN2C, GRIN2D, GRIN3A	infectious disease, neurology/psychiatry	influenza A virus infection, Parkinson's Disease	DKNWSYNQZKUICI-UHFFFAOYSA-N
ketoprofen	['P02545', 'P10636', 'P23219', 'P28482', 'P35354', 'Q16637', 'Q4U2R8']	cyclooxygenase inhibitor	CXCR1, PTGS1, PTGS2, SLC5A8	rheumatology	rheumatoid arthritis, osteoarthritis	DKYWVDODHFEZIM-UHFFFAOYSA-N
pargyline	['O75604', 'P02545', 'P16473', 'P21397', 'P27338', 'P54132', 'Q16637']	monoamine oxidase inhibitor	MAOA, MAOB	cardiology	hypertension	DPWPWRLQFGFJFI-UHFFFAOYSA-N
primidone	['P16473', 'Q9NUW8']	GABA receptor antagonist	CHRNA4, CHRNA7, GABRA1, GABRA2, GABRA3, GABRA4, GABRA5, GABRA6, GABRB1, GABRB2, GABRB3, GABRD, GABRE, GABRG1, GABRG2, GABRG3, GABRP, GABRQ, GRIA2, GRIK2, SCN10A, SCN11A, SCN1A, SCN2A, SCN3A, SCN4A, SCN5A, SCN7A, SCN8A, SCN9A	neurology/psychiatry	seizures	DQMZLTXERSFNPB-UHFFFAOYSA-N
practolol		adrenergic receptor antagonist	ADRB1			DURULFYMVIFBIR-UHFFFAOYSA-N
oxybenzone	[]	lipase inhibitor	LIPE	dermatology	sunscreen lotion	DXGLGDHPHMLXJC-UHFFFAOYSA-N
ebselen	['B2RXH2', 'O15305', 'O60240', 'O75936', 'P00352', 'P02545', 'P04637', 'P06276', 'P06746', 'P10636', 'P11137', 'P14618', 'P14902', 'P15428', 'P16050', 'P18054', 'P22303', 'P34913', 'P34949', 'P40225', 'Q00G26', 'Q14376', 'Q6W5P4', 'Q8TCT1', 'Q8WTS1', 'Q99714', 'Q9NUW8']	cyclooxygenase inhibitor, glutathione peroxidase agonist, H+/K+-ATPase inhibitor, nitric oxide synthase inhibitor	ALB			DYEFUKCXAQOFHX-UHFFFAOYSA-N
benperidol	['P02545', 'P14416', 'P21917', 'P28223', 'P35462', 'Q16665']	dopamine receptor antagonist	DRD2	neurology/psychiatry	schizophrenia	FEBOTPHFXYHVPL-UHFFFAOYSA-N
ondansetron	['O15244', 'P41595', 'P46098', 'Q12809', 'Q86VL8', 'Q96FL8']	serotonin receptor antagonist	HTR1A, HTR1B, HTR3A, HTR3B, HTR4, OPRM1	gastroenterology	nausea, vomiting	FELGMEQIXOGIFQ-UHFFFAOYSA-N
carbamazepine	['P02545', 'P16473', 'P28482']	carboxamide antiepileptic	SCN10A, SCN11A, SCN1A, SCN2A, SCN3A, SCN4A, SCN5A, SCN7A, SCN8A, SCN9A	neurology/psychiatry	seizures	FFGPTBGBLSHEPO-UHFFFAOYSA-N
adipiodone	['P16473', 'P28482']					FFINMCNLQNTKLU-UHFFFAOYSA-N
domperidone	['O15244', 'O75604', 'P02545', 'P08913', 'P14416', 'P18089', 'P18825', 'P19838', 'P23975', 'P25100', 'P28223', 'P28335', 'P31645', 'P35367', 'P35372', 'P35462', 'P41145', 'P41595', 'Q12809', 'Q16665', 'Q96FL8']	dopamine receptor antagonist	DRD2, DRD3	infectious disease	fescue toxicosis	FGXWKSZFVQUSTL-UHFFFAOYSA-N
pizotifen	['P11229', 'P14416', 'P28223', 'P28335', 'P34969', 'P41595']	serotonin receptor antagonist	HTR1A, HTR2A, HTR2C	neurology/psychiatry	migraine headache	FIADGNVRKBPQEU-UHFFFAOYSA-N
trioxsalen	['B2RXH2', 'P00352', 'P21397', 'P28335', 'P28482', 'P29274']	DNA synthesis inhibitor		dermatology	vitiligo, eczema	FMHHVULEAZTJMA-UHFFFAOYSA-N
triamterene	['B2RXH2', 'O60674', 'P02545', 'P08311', 'P15428', 'P16473', 'P18054', 'P19838', 'P28482', 'Q16637', 'Q99714']	sodium channel blocker	SCNN1A, SCNN1B, SCNN1D, SCNN1G	endocrinology, cardiology	hypokalemia, hypertension, edema	FNYLWPVRPXGIIP-UHFFFAOYSA-N
ketanserin	['P00352', 'P02545', 'P04637', 'P08908', 'P0DMS8', 'P14416', 'P15428', 'P18054', 'P21917', 'P28221', 'P28222', 'P28223', 'P28335', 'P28482', 'P34969', 'P35367', 'P41595', 'P50406', 'Q6W5P4', 'Q99720']	serotonin receptor antagonist	ADRA1A, ADRA1B, ADRA1D, DRD1, DRD5, HTR1A, HTR1B, HTR1D, HTR2A, HTR2B, HTR2C, HTR5A, HTR7, SLC18A1, SLC18A2	cardiology	hypertension	FPCCSQOGAWCVBH-UHFFFAOYSA-N
praziquantel	['P04637', 'P54132', 'Q16637', 'Q6W5P4']	anthelmintic agent		infectious disease	gastrointestinal parasites, cystic hydatid disease, schistosomiasis	FSVJFNAIGNNGKK-UHFFFAOYSA-N
riluzole	['O15118', 'O75604', 'P10253', 'P23975', 'P28482', 'P51151', 'Q99250']	glutamate inhibitor	KCNK10, KCNK2, KCNK4, KCNN4, SCN10A, SCN11A, SCN1A, SCN2A, SCN3A, SCN4A, SCN5A, SCN7A, SCN8A, SCN9A, SLC7A11	neurology/psychiatry	amyotrophic lateral sclerosis (ALS)	FTALBRSUTCGOEG-UHFFFAOYSA-N
enalapril	['P02545', 'P12821', 'Q16637']	angiotensin converting enzyme inhibitor	ACE	cardiology	hypertension, congestive heart failure, left ventricular systolic dysfunction (LVSD)	GBXSMTUPTTWBMN-XIRDDKMYSA-N
diazoxide	['P00352', 'P02545', 'P10828', 'Q16637']	potassium channel activator	ATP1A1, CA1, CA2, KCNJ11, KCNJ8, KCNMA1, SLC12A3	endocrinology	hypoglycemia	GDLBFKVLRPITMI-UHFFFAOYSA-N
clomipramine	['P08172', 'P08173', 'P08912', 'P08913', 'P10828', 'P11229', 'P14416', 'P16473', 'P18089', 'P18825', 'P20309', 'P21728', 'P23975', 'P25021', 'P25100', 'P28223', 'P28335', 'P31645', 'P35367', 'P35462', 'P41595', 'P50406', 'Q01959', 'Q6W5P4', 'Q99720']	serotonin transporter (SERT) inhibitor	GSTP1, HTR2A, HTR2B, HTR2C, SLC6A2, SLC6A3, SLC6A4	neurology/psychiatry	obsessive compulsive disorder (OCD)	GDLIGKIOYRNHDA-UHFFFAOYSA-N
diclofenamide	['O43570', 'P00915', 'P00918', 'P02545', 'P22748', 'P23280', 'P35218', 'P43166', 'Q16790', 'Q8N1Q1', 'Q9ULX7', 'Q9Y2D0']	carbonic anhydrase inhibitor	CA1, CA12, CA2, CA4, CA7	ophthalmology, neurology/psychiatry	glaucoma, epilepsy	GJQPMPFPNINLKP-UHFFFAOYSA-N
clonidine	['O15245', 'P02545', 'P08908', 'P08913', 'P18089', 'P18825', 'P25100', 'P35348', 'P35368', 'P54132', 'Q9Y2I1']	adrenergic receptor agonist	ADRA1A, ADRA1B, ADRA1D, ADRA2A, ADRA2B, ADRA2C	cardiology, neurology/psychiatry	hypertension, attention-deficit/hyperactivity disorder (ADHD)	GJSURZIOUXUGAL-UHFFFAOYSA-N
methocarbamol	['Q16637']	muscle relaxant	CA1	neurology/psychiatry	muscle relaxant	GNXFOGHNGIVQEH-UHFFFAOYSA-N
nafcillin	['P02545']	bacterial cell wall synthesis inhibitor	CYP1A2, CYP3A4, SLC22A6	infectious disease	gram-positive bacterial infections	GPXLMGHLHQJAGZ-JTDSTZFVSA-N
remoxipride	['P08908', 'P14416', 'P21917', 'Q16665', 'Q99720']	dopamine receptor antagonist	DRD2, DRD3, DRD4, HTR2A, SIGMAR1			GUJRSXAPGDDABA-NSHDSACASA-N
troglitazone	['P00918', 'P0DMS8', 'P24557', 'P27338', 'P28482', 'P37231', 'P41595']	insulin sensitizer, PPAR receptor agonist	ACSL4, ESRRA, ESRRG, PPARG, SERPINE1, SLC29A1, TRPM3			GXPHKUHSUJUWKP-UHFFFAOYSA-N
raloxifene	['O14939', 'O75604', 'P00352', 'P02545', 'P03372', 'P06241', 'P08913', 'P10636', 'P14416', 'P18089', 'P18825', 'P21452', 'P21728', 'P22303', 'P23975', 'P25100', 'P28223', 'P28335', 'P29274', 'P31645', 'P35372', 'P35462', 'P41143', 'P41145', 'P41595', 'P50406', 'Q01959', 'Q13393', 'Q15125', 'Q92731', 'Q99714', 'Q99720']	estrogen receptor antagonist, selective estrogen receptor modulator (SERM)	ESR1, ESR2	orthopedics, oncology	osteoporosis, breast cancer	GZUITABIAKMVPG-UHFFFAOYSA-N
brinzolamide	['O43570', 'P00915', 'P00918', 'P22748', 'P23280', 'P35218', 'P43166', 'Q16790', 'Q8N1Q1', 'Q9ULX7', 'Q9Y2D0']	carbonic anhydrase inhibitor	CA1, CA12, CA14, CA2, CA4, CA5A, CA7	ophthalmology	intraocular pressure, glaucoma, ocular hypertension	HCRKCZRJWPKOAR-JTQLQIEISA-N
desipramine	['P19838', 'P23975', 'P28223', 'P28482', 'P31645', 'Q01959', 'Q12809', 'Q14524']	tricyclic antidepressant	ADRA1A, ADRA1B, ADRA1D, ADRA2A, ADRA2B, ADRA2C, ADRB1, ADRB2, CHRM1, CHRM2, CHRM3, CHRM4, CHRM5, DRD2, HRH1, HTR1A, HTR2A, HTR2C, SLC6A2, SLC6A4, SMPD1	neurology/psychiatry	depression	HCYAFALTSJYZDH-UHFFFAOYSA-N
fenbendazole	['P02545', 'Q16539']	tubulin polymerization inhibitor	TUBB	infectious disease	gastrointestinal parasites, gastrointestinal roundworms	HDDSHPAODJUKPD-UHFFFAOYSA-N
bendroflumethiazide	['P02545']	sodium/potassium/chloride transporter inhibitor	CA1, CA2, CA4, KCNMA1, SLC12A1, SLC12A3	cardiology	hypertension	HDWIHXWEUNVBIY-UHFFFAOYSA-N
ibuprofen-(S)	['P02545', 'P16473', 'P23219', 'P25024', 'P25025', 'P35354', 'P54132']					HEFNNWSXXWATRW-JTQLQIEISA-N
ciclacillin	['P02545']					HGBLNBBNRORJKI-WCABBAIRSA-N
tinidazole	['P02545', 'Q16637']	antiprotozoal agent		infectious disease, obstetrics/gynecology	giardiasis, amebiasis, bacterial vaginosis, trichomoniasis	HJLSLZFTEKNLFI-UHFFFAOYSA-N
zardaverine	['P02545', 'P04637', 'P28482', 'P54132', 'Q07343', 'Q08499', 'Q13370', 'Q14432', 'Q16637']	phosphodiesterase inhibitor	PDE4D			HJMQDJPMQIHLPB-UHFFFAOYSA-N
rolipram	['O76074', 'P27815', 'P28482', 'P54132', 'Q07343', 'Q08493', 'Q08499']	phosphodiesterase inhibitor				HJORMJIFDVBMOB-UHFFFAOYSA-N
tetramisole	['P02545']	immunostimulant		infectious disease	gastrointestinal parasites	HLFSDGLLUJUHTE-UHFFFAOYSA-N
mycophenolic-acid	['P02545', 'P12268', 'P20839', 'Q16637']	dehydrogenase inhibitor, inositol monophosphatase inhibitor	IMPDH1, IMPDH2	transplant	organ rejection	HPNSFSBZBAHARI-RUDMXATFSA-N
pirenperone	['P08908', 'P14618', 'P16473', 'P28335', 'Q16637']	serotonin receptor antagonist	HTR2A, HTR7			HXCNRYXBZNHDNE-UHFFFAOYSA-N
pioglitazone	['O95342', 'P00918', 'P19793', 'P27338', 'P37231', 'Q07869', 'Q9NZ45']	insulin sensitizer, PPAR receptor agonist	PPARG, TRPM3	endocrinology	diabetes mellitus	HYAFETHFCAUJAY-UHFFFAOYSA-N
nimesulide	['O00255', 'P02545', 'P05164', 'P06280', 'P16473', 'P35354', 'Q03164', 'Q16665']	cyclooxygenase inhibitor	LTF, PLA2G2E, PTGS1, PTGS2	rheumatology, obstetrics/gynecology	osteoarthritis, menstrual pain	HYWYRSMBCFDLJT-UHFFFAOYSA-N
mefenamic-acid	['O60218', 'P23219', 'P35354', 'P42330', 'P52895', 'Q04828', 'Q16665', 'Q9NUW8']	cyclooxygenase inhibitor	KCNQ1, PTGS1, PTGS2, TRPM3	endocrinology	primary dysmenorrhea (PD)	HYYBABOKPJLUIN-UHFFFAOYSA-N
phenformin	['O15245', 'P02545', 'Q16665', 'Q9NUW8']	AMPK activator	KCNJ8, PRKAA1			ICFJFFQQTFMIBG-UHFFFAOYSA-N
prazosin	['O15245', 'P03956', 'P08913', 'P0DMS8', 'P14780', 'P16083', 'P18089', 'P18825', 'P21917', 'P25100', 'P28221', 'P35348', 'P35368', 'P41595', 'Q12809', 'Q96FL8']	adrenergic receptor antagonist	ADRA1A, ADRA1B, ADRA1D, ADRA2A, ADRA2B, ADRA2C, KCNH2, KCNH6, KCNH7	cardiology	hypertension	IENZQIKPVFGBNW-UHFFFAOYSA-N
bezafibrate	['Q16637']	PPAR receptor agonist	PPARA, PPARD, PPARG	cardiology	cholesterol	IIBYAHWJQTYFKB-UHFFFAOYSA-N
primaquine	['P16083', 'P31645', 'P43351', 'P55210', 'P55212']	antimalarial agent, DNA inhibitor	KRT7, NQO2	infectious disease	malaria	INDBQLZJXZLFIT-UHFFFAOYSA-N
guanfacine	['O75496', 'P02545', 'P08913', 'P10636', 'P18089', 'P18825', 'P28223', 'P28335', 'P28482', 'P41595', 'Q16665', 'Q99714', 'Q9Y2I1']	adrenergic receptor agonist	ADRA2A, ADRA2B, ADRA2C	cardiology	hypertension	INJOMKTZOLKMBF-UHFFFAOYSA-N
nisoxetine	['P23975', 'P31645', 'Q01959']	norepinephrine reuptake inhibitor	SLC6A2, SLC6A3, SLC6A4			ITJNARMNRKSWTA-UHFFFAOYSA-N
metoprolol	['P07550', 'P08588', 'Q6W5P4', 'Q9NUW8']	adrenergic receptor antagonist	ADRB1, ADRB2	cardiology	hypertension, angina pectoris, myocardial infarction	IUBSYMUCCVWXPE-UHFFFAOYSA-N
pinacidil	['O60706', 'P02545', 'P06280', 'P54132', 'Q14654', 'Q6W5P4']	ATP channel activator, potassium channel activator	ABCC8, ABCC9	cardiology	hypertension	IVVNZDGDKPTYHK-UHFFFAOYSA-N
MD-920		NFkB pathway inhibitor	AADACL2			IXORZMNAPKEEDV-OBDJNFEBSA-N
amiodarone	['O00255', 'P02545', 'P04626', 'P06241', 'P08172', 'P08173', 'P08912', 'P08913', 'P10827', 'P10828', 'P11229', 'P16473', 'P18089', 'P19838', 'P20309', 'P21728', 'P23975', 'P28223', 'P28335', 'P28482', 'P30411', 'P31645', 'P33032', 'P35462', 'P37268', 'P41143', 'P41595', 'P41597', 'Q01959', 'Q03164', 'Q12809', 'Q15125', 'Q16637', 'Q99720']	potassium channel blocker	ADRB1, CACNA1H, CACNA2D2, KCNA7, KCNH2	cardiology	ventricular arrhythmias	IYIKLHRQXLHMJQ-UHFFFAOYSA-N
chlorambucil	['P00352', 'P16473', 'P19838', 'P40225', 'Q16665']	DNA inhibitor		hematologic malignancy	chronic lymphocytic leukemia (CLL), Hodgkin's lymphoma	JCKYGMPEJWAADB-UHFFFAOYSA-N
benzylpenicillin	['P21462', 'Q16637']	penicillin binding protein inhibitor		infectious disease	celluitis, meningitis, endocarditis, syphilis, pneumonia, bacterial septicemia	JGSARLDLIJGVTE-MBNYWOFBSA-N
chlorthalidone	['O43570', 'P00915', 'P00918', 'P10636', 'P22748', 'P23280', 'P35218', 'P43166', 'Q16790', 'Q9ULX7', 'Q9Y2D0']	carbonic anhydrase inhibitor	CA1, CA12, CA14, CA4, CA7, SLC12A1, SLC12A3	cardiology, gastroenterology, rheumatology, nephrology	hypertension, edema, congestive heart failure, hepatic cirrhosis, nephrotic syndrome, acute glomerulonephritis (AGN), chronic renal failure	JIVPVXMEBJLZRO-UHFFFAOYSA-N
sertaconazole	['P07900', 'P14902']	sterol demethylase inhibitor		infectious disease	tinea pedis	JLGKQTAYUIMGRK-UHFFFAOYSA-N
meptazinol		opioid receptor agonist	BCHE	neurology/psychiatry	pain relief	JLICHNCFTLFZJN-UHFFFAOYSA-N
tolbutamide	['P02545']	ATP channel blocker	ABCC8, KCNJ1, KCNJ11, KCNJ8	endocrinology	diabetes mellitus	JLRGJRBPOGGCBT-UHFFFAOYSA-N
dobutamine	['O43570', 'P00533', 'P00915', 'P00918', 'P06239', 'P06241', 'P07451', 'P07550', 'P08588', 'P10636', 'P18089', 'P22748', 'P23280', 'P23975', 'P25100', 'P31645', 'P35218', 'P35462', 'P43166', 'Q01959', 'Q16790', 'Q8N1Q1', 'Q99720', 'Q9Y2D0']	adrenergic receptor agonist	ADRB1, ADRB2	cardiology	congestive heart failure	JRWZLRBJNMZMFE-UHFFFAOYSA-N
tremorine	['P02545']	acetylcholine receptor agonist				JSUAJTLKVREZHV-UHFFFAOYSA-N
propafenone	['O14649', 'O60706', 'O95069', 'P07550', 'P08183', 'P08588', 'P13945', 'P23975', 'P28223', 'P28335', 'P41595', 'P50406', 'Q01959', 'Q12809', 'Q14524', 'Q14654', 'Q16637', 'Q99720']	antiarrhythmic	ADRB1, ADRB2, KCNA5, KCNH2, SCN5A	cardiology	atrial fibrillation (AF), ventricular tachycardia (VT), ventricular arrhythmias	JWHAUXFOSRPERK-UHFFFAOYSA-N
pindolol	['P02545', 'P06280', 'P07550', 'P08588', 'P08908', 'P13945', 'P19838', 'P28222', 'P28482']	adrenergic receptor antagonist	ADRB1, ADRB2, HTR1A, HTR1B, HTR2A, HTR2B	cardiology	hypertension	JZQKKSLKJUAGIC-UHFFFAOYSA-N
naftidrofuryl	['O00255', 'P28223', 'Q03164']	adrenergic receptor antagonist		cardiology	claudication	KBAFPSLPKGSANY-UHFFFAOYSA-N
proxymetacaine	['P21397', 'Q99720']	sodium channel blocker	SCN10A, SCN5A	neurology/psychiatry	anesthetic	KCLANYCVBBTKTO-UHFFFAOYSA-N
bisacodyl	['P02545', 'P16473', 'P41145', 'P42226', 'Q01959', 'Q16665', 'Q9Y2T6']	laxative		gastroenterology	constipation	KHOITXIGCFIULA-UHFFFAOYSA-N
mitoxantrone	['O75496', 'O96028', 'P00533', 'P02545', 'P04626', 'P04637', 'P06241', 'P06746', 'P08172', 'P08173', 'P10636', 'P11229', 'P11309', 'P11388', 'P16050', 'P19784', 'P19838', 'P23975', 'P27695', 'P28335', 'P28482', 'P29372', 'P33527', 'P40225', 'P42345', 'P42858', 'P67870', 'P68400', 'Q06187', 'Q06710', 'Q12809', 'Q16637', 'Q16665', 'Q6W5P4', 'Q86VL8', 'Q8NEV1', 'Q96FL8', 'Q9NUW8', 'Q9Y468']	topoisomerase inhibitor	TOP2A	neurology/psychiatry, oncology, hematologic malignancy	multiple sclerosis, prostate cancer, acute myeloid leukemia (AML)	KKZJGLLVHKMTCM-UHFFFAOYSA-N
ciprofibrate	['P02545', 'Q07869']	PPAR receptor agonist	PPARA	endocrinology	hyperlipidemia	KPSRODZRAIWAKH-UHFFFAOYSA-N
amitriptyline	['B2RXH2', 'O00255', 'P02545', 'P07949', 'P08172', 'P08173', 'P08912', 'P08913', 'P11229', 'P14416', 'P18089', 'P18825', 'P19838', 'P20309', 'P21728', 'P21918', 'P23975', 'P25021', 'P25100', 'P28223', 'P28335', 'P31645', 'P35367', 'P35462', 'P41595', 'P50406', 'Q01959', 'Q03164', 'Q14524', 'Q15858', 'Q99250', 'Q99714', 'Q99720']	norepinephrine inhibitor, norepinephrine reuptake inhibitor, serotonin receptor antagonist, serotonin‚Äö√Ñ√¨norepinephrine reuptake inhibitor (SNRI)	ADRA1A, ADRA1B, ADRA1D, ADRA2A, ADRB1, ADRB2, ADRB3, CHRM1, CHRM2, CHRM3, CHRM4, CHRM5, HRH1, HRH2, HRH4, HTR1A, HTR1B, HTR1D, HTR2A, HTR2C, HTR6, HTR7, KCNA1, KCND2, KCND3, KCNQ2, KCNQ3, NTRK1, NTRK2, OPRD1, OPRK1, OPRM1, SIGMAR1, SLC6A2, SLC6A4	neurology/psychiatry	depression	KRMDCWKBEZIMAB-UHFFFAOYSA-N
parthenolide-(alternate-stereo)	[]	NFkB pathway inhibitor	IKBKB, RELA			KTEXNACQROZXEV-PVLRGYAZSA-N
benzamil	['P00352', 'P10636', 'P19838', 'P37088', 'Q16665']	sodium channel blocker	ASIC1, PKD2L1, SCNN1A, SCNN1B, SCNN1D, SCNN1G, SLC8A1			KXDROGADUISDGY-UHFFFAOYSA-N
picotamide	['P54132', 'Q9Y468']	thromboxane receptor antagonist, thromboxane synthase inhibitor	TBXA2R	hematology	thrombosis	KYWCWBXGRWWINE-UHFFFAOYSA-N
apigenin	['O15118', 'O75604', 'O95067', 'O95271', 'P00352', 'P02766', 'P03372', 'P04637', 'P06493', 'P08183', 'P10275', 'P14061', 'P14618', 'P14635', 'P16050', 'P16473', 'P19784', 'P21397', 'P22303', 'P33527', 'P35354', 'P36888', 'P40225', 'P43405', 'P47989', 'P49841', 'P67870', 'P68400', 'Q00534', 'Q00535', 'Q15078', 'Q16665', 'Q8WWL7', 'Q92731', 'Q99714', 'Q9H2K2', 'Q9NPH5', 'Q9NUW8', 'Q9UNQ0']	casein kinase inhibitor, cell proliferation inhibitor	AKR1B1, AR, CDK6, CFTR, CYP19A1, CYP1B1, HSD17B1			KZNIFHPLKGYRTM-UHFFFAOYSA-N
thiocolchicoside		GABA receptor antagonist	GABRA1, GABRB2, GABRG2, GLRA1, GLRB	neurology/psychiatry	muscle relaxant	LEQAKWQJCITZNK-AXHKHJLKSA-N
econazole	['O00255', 'P07900', 'P08172', 'P08173', 'P08588', 'P08913', 'P0DMS8', 'P11229', 'P13945', 'P14416', 'P14780', 'P14902', 'P18089', 'P20309', 'P21452', 'P21728', 'P21917', 'P23975', 'P24557', 'P25021', 'P25100', 'P25103', 'P25929', 'P28223', 'P28335', 'P31645', 'P35372', 'P35462', 'P41143', 'P41145', 'P41595', 'P46063', 'P50406', 'Q01959', 'Q03164']	lanosterol demethylase inhibitor, sterol demethylase inhibitor	CYP51A1, NPY1R, NPY2R, TRPM2, TRPV5	infectious disease	tinea pedis, tinea cruris, tinea corporis, tinea versicolor, cutaneous candidiasis	LEZWWPYKPKIXLL-UHFFFAOYSA-N
gliquidone	['B2RXH2', 'P02545', 'Q16665']	sulfonylurea	ABCC8, KCNJ10, KCNJ8	endocrinology	diabetes mellitus	LLJFMFZYVVLQKT-UHFFFAOYSA-N
quinidine	['P06276', 'P08183', 'P22460', 'Q12809', 'Q9NUW8']	sodium channel blocker	KCNA5, KCNA7, KCNH1, KCNH2, KCNH5, KCNK1, KCNK6, SCN5A, SLC29A4	infectious disease, cardiology	malaria, atrial fibrillation (AF), ventricular arrhythmias	LOUPRKONTZGTKE-LHHVKLHASA-N
flufenamic-acid	['O60218', 'P02545', 'P02766', 'P05164', 'P16473', 'P23219', 'P35354', 'P42330', 'P52895', 'Q04828', 'Q16665']	chloride channel blocker	AKR1C3, ANO1, AR, GJA1, GJA10, GJA3, GJA4, GJA5, GJA8, GJA9, GJB1, GJB2, GJB3, GJB4, GJB5, GJB6, GJB7, GJC1, GJC2, GJC3, GJD2, GJD3, GJD4, GJE1, PANX1, PANX2, PANX3, PKD2L1, PTGS1, PTGS2, TRPC5, TRPM2, TRPM5			LPEPZBJOKDYZAD-UHFFFAOYSA-N
fenoterol	['P07550', 'P28482', 'Q6W5P4']	adrenergic receptor agonist	ADRB1, ADRB2, ADRB3			LSLYOANBFKQKPT-UHFFFAOYSA-N
dihydroergotamine	['P02545', 'P08913', 'P14416', 'P18089', 'P18825', 'P21728', 'P25100', 'P28223', 'P28335', 'P35462', 'P41595', 'P50406', 'Q16637', 'Q6W5P4', 'Q96FL8']	serotonin receptor agonist	ADRA2A, DRD2, HTR1B, HTR1D, HTR1E, HTR1F, HTR2B, HTR7	neurology/psychiatry	migraine headache	LUZRJRNZXALNLM-JGRZULCMSA-N
carteolol	['P08588']	adrenergic receptor antagonist	ADRB1, ADRB2	ophthalmology	intraocular pressure, glaucoma, ocular hypertension	LWAFSWPYPHEXKX-UHFFFAOYSA-N
boldine	['B2RXH2', 'P00352', 'P02545', 'P17787', 'P43681', 'Q16665']					LZJRNLRASBVRRX-ZDUSSCGKSA-N
bumetanide	['O75604', 'P02545', 'P16473', 'Q16665', 'Q6W5P4']	solute carrier family member inhibitor	CFTR, GPR35, SLC12A1, SLC12A2, SLC12A4, SLC12A5	cardiology	edema, congestive heart failure	MAEIEVLCKWDQJH-UHFFFAOYSA-N
benzonatate		local anesthetic	SCN5A	pulmonary	cough suppressant	MAFMQEKGGFWBAB-UHFFFAOYSA-N
dioxybenzone	['P15428', 'Q16665']	topical sunscreen agent				MEZZCSHVIGVWFI-UHFFFAOYSA-N
flutamide	['P02545', 'P10275']	androgen receptor antagonist	AHR, AR	oncology	prostate cancer	MKXKFYHWDHIYRV-UHFFFAOYSA-N
dextromethorphan	['P02545', 'P16473', 'P31645', 'Q99720']	glutamate receptor antagonist, sigma receptor agonist	CHRNA2, CHRNA3, CHRNA4, CHRNA7, CHRNB2, CHRNB4, CYBA, CYBB, GRIN3A, NCF1, NCF2, NCF4, OPRD1, OPRK1, OPRM1, PGRMC1, RAC1, RAC2, SIGMAR1, SLC6A2, SLC6A4	pulmonary	cough suppressant	MKXZASYAUGDDCJ-NJAFHUGGSA-N
phentolamine	['P02545', 'P08913', 'P18089', 'P18825', 'P19838', 'P25100', 'P28223', 'P28335', 'P35348', 'P35368', 'P41595', 'P54132', 'Q99720', 'Q9Y2I1']	adrenergic receptor antagonist	ADRA1A, ADRA1B, ADRA1D, ADRA2A, ADRA2B, ADRA2C	endocrinology, cardiology	pheochromocytoma, hypertension	MRBDMNSDAVCSSF-UHFFFAOYSA-N
piperine	['O15118', 'P27338', 'P51151', 'Q8NER1']	monoamine oxidase inhibitor	MAOA, MAOB, TRPV1			MXXWOMGUGJBKIW-YPCIICBESA-N
vanoxerine	['O00255', 'P00352', 'P02545', 'P0DMS8', 'P23975', 'P31645', 'P35372', 'P40225', 'P41145', 'Q01959', 'Q03164', 'Q99720']	dopamine uptake inhibitor	SLC6A3			NAUWTFJOPJWYOT-UHFFFAOYSA-N
benzthiazide	['Q16637']	carbonic anhydrase inhibitor	CA1, CA12, CA2, CA4, CA9, SLC12A3	cardiology	hypertension, edema	NDTSRXAMMQDVSW-UHFFFAOYSA-N
nalbuphine	['P35372', 'P41143', 'P41145']	opioid receptor agonist, opioid receptor antagonist	OPRD1, OPRK1, OPRM1	neurology/psychiatry	pain relief	NETZHAKZCGBWSS-CEDHKZHLSA-N
sulfafurazole	['P16473', 'P25101']	bacterial antifolate		infectious disease	urinary tract infections	NHUHCSRWZMLRLA-UHFFFAOYSA-N
valproic-acid	['P19838', 'Q6W5P4', 'Q9NUW8']	HDAC inhibitor	ABAT, ACADSB, ALDH5A1, HDAC1, HDAC2, HDAC9, OGDH, SCN10A, SCN11A, SCN1A, SCN1B, SCN2A, SCN2B, SCN3A, SCN3B, SCN4A, SCN4B, SCN5A, SCN7A, SCN8A, SCN9A	neurology/psychiatry	seizures	NIJJYAXOARWZEE-UHFFFAOYSA-N
flupentixol	['O00255', 'O94782', 'O95069', 'Q03164', 'Q8TAF3', 'Q99720', 'Q9NUW8']	dopamine receptor antagonist	ADRA1A, CHRM1, DRD1, DRD2, DRD3, DRD5, HTR2A	neurology/psychiatry	schizophrenia, depression	NJMYODHXAKYRHW-DVZOWYKESA-N
tamoxifen	['P00533', 'P03372', 'P04626', 'P06239', 'P06241', 'P06401', 'P08172', 'P08173', 'P08183', 'P08912', 'P08913', 'P0DMS8', 'P11229', 'P11474', 'P13945', 'P14416', 'P18089', 'P20309', 'P21452', 'P21728', 'P21917', 'P23219', 'P23975', 'P24557', 'P25021', 'P25100', 'P28223', 'P28335', 'P29274', 'P31645', 'P35462', 'P40225', 'P41143', 'P41145', 'P41595', 'P50406', 'P54132', 'Q01959', 'Q12809', 'Q15125'…	estrogen receptor antagonist, selective estrogen receptor modulator (SERM)	EBP, ESR1, ESR2, GPER1, PRKCA, PRKCB, PRKCD, PRKCE, PRKCG, PRKCI, PRKCQ, PRKCZ	oncology	breast cancer	NKANXQFJJICGDU-QPLCGJKRSA-N
etodolac	['P23219', 'P35354', 'P54132']	cyclooxygenase inhibitor	PTGS1, PTGS2, RXRA	rheumatology	osteoarthritis, rheumatoid arthritis	NNYBQONXHNTVIJ-UHFFFAOYSA-N
nialamide	['B2RXH2', 'P02545', 'P16473', 'Q16637']	monoamine oxidase inhibitor	COMT, MAOA, MAOB			NOIIUHRQUVNIDD-UHFFFAOYSA-N
thiostrepton		FOXM1 inhibitor, protein synthesis inhibitor	FOXM1	obstetrics/gynecology	mastitis	NSFFHOGKXHRQEW-DVRIZHICSA-N
betaxolol	['P08588']	adrenergic receptor antagonist	ADRB1, ADRB2	ophthalmology	intraocular pressure, glaucoma, ocular hypertension	NWIUTZDMDHAVTP-UHFFFAOYSA-N
meclizine	['O00255', 'P05981', 'P28482', 'Q03164']	constitutive androstane receptor (CAR) agonist	HRH1, NR1I3	gastroenterology, neurology/psychiatry	nausea, vomiting, motion sickness	OCJYIGYOJCODJL-UHFFFAOYSA-N
strophanthidin	['O15118', 'P04637', 'P51151', 'Q06710', 'Q16665', 'Q99814']					ODJLBQGVINUMMR-HZXDTFASSA-N
racecadotril		enkephalinase inhibitor	MME	gastroenterology	diarrhea	ODUOJXZPIYUATO-UHFFFAOYSA-N
oxaprozin	['P02545', 'P23219', 'P28482']	cyclooxygenase inhibitor	PTGS1, PTGS2	rheumatology	osteoarthritis, rheumatoid arthritis	OFPXSFXSNFPTHF-UHFFFAOYSA-N
forskolin	['P11166', 'P51843', 'Q03164', 'Q08828']	adenylyl cyclase activator	ADCY2, ADCY5, GNAS			OHCQJHSOBUTRHG-KGGHGJDLSA-N
carbinoxamine	[]	histamine receptor antagonist	HRH1	allergy, ophthalmology, otolaryngology, dermatology	allergic rhinitis, conjunctivitis, vasomotor rhinitis, dermatographism	OJFSXZCBGQGRNV-UHFFFAOYSA-N
propofol	['P02545', 'P23219', 'P23975', 'P28335', 'P41595', 'P47870']	benzodiazepine receptor agonist	FAAH, GABRA1, GABRA2, GABRA3, GABRA4, GABRA5, GABRA6, GABRB1, GABRB2, GABRB3, GABRD, GABRE, GABRG1, GABRG2, GABRG3, GABRP, GABRQ, SCN2A, SCN4A	neurology/psychiatry	anesthetic	OLBCVFGFOZPWHH-UHFFFAOYSA-N
mebendazole	['P00519', 'P02545', 'P35968', 'P42858', 'Q16665']	tubulin polymerization inhibitor	TUBA1A, TUBB, TUBB4B	infectious disease	pinworm, whipworm, hookworm, ascariasis	OPXLLQIJSORQAM-UHFFFAOYSA-N
bemegride	[]	chemoreceptor agonist	GABRA1	critical care	poison antidote	ORRZGUBHBVWWOP-UHFFFAOYSA-N
tolazamide	['P00352', 'P06280', 'P18054']	ATP channel blocker	ABCC8, KCNJ1, KCNJ10, KCNJ11	endocrinology	diabetes mellitus	OUDSBRTVNLOZBN-UHFFFAOYSA-N
naftifine	['Q15125', 'Q99720']	fungal squalene epoxidase inhibitor	SQLE	infectious disease	tinea pedis, tinea cruris, tinea corporis	OZGNYLLQHRPOBR-DHZHZOJOSA-N
dantrolene	['P02545', 'Q16637', 'Q9NZ45']	calcium channel blocker	RYR1, RYR3	neurology/psychiatry, endocrinology	spasms, malignant hyperthermia (MH)	OZOMQRBLCMDCEG-VIZOYTHASA-N
ketorolac	['P23219', 'P35354', 'P42858', 'P51151', 'P54132']	cyclooxygenase inhibitor	PTGS1, PTGS2			OZWKMVRBQXNZKK-UHFFFAOYSA-N
alprenolol	['P02545', 'P07550', 'P08588', 'P13945', 'Q9NUW8']	adrenergic receptor antagonist	ADRB1, ADRB2, HTR1A	cardiology	angina pectoris	PAZJSJFMUHDSTF-UHFFFAOYSA-N
tracazolate	['O75604', 'P02545', 'P40225', 'Q16637', 'Q92793', 'Q99714']	GABA receptor modulator	GABRA1			PCTRYMLLRKWXGF-UHFFFAOYSA-N
iobenguane	['P40225']	antineoplastic agent		oncology, cardiology, endocrinology	neuroblastoma, congestive heart failure, pheochromocytoma	PDWUPXJEEYOOTR-UHFFFAOYSA-N
ricinine	['P02545']					PETSAYFQSGAEQY-UHFFFAOYSA-N
nortriptyline	['P02545', 'P07949', 'P08172', 'P08173', 'P08912', 'P08913', 'P10636', 'P11229', 'P16473', 'P18089', 'P18825', 'P20309', 'P21728', 'P23975', 'P25021', 'P25100', 'P28223', 'P28335', 'P31645', 'P35367', 'P35462', 'P41595', 'P50406', 'Q01959', 'Q6W5P4']	tricyclic antidepressant	ADRA1A, ADRA1B, ADRA1D, ADRA2A, ADRA2B, ADRA2C, ADRB1, ADRB2, ADRB3, CHRM1, CHRM2, CHRM3, CHRM4, CHRM5, DRD2, HRH1, HTR1A, HTR2A, HTR2C, HTR6, KCNJ10, PGRMC1, SIGMAR1, SLC6A2, SLC6A4	neurology/psychiatry	depression	PHVGLTMQBUFIQQ-UHFFFAOYSA-N
physostigmine	['P02545', 'P06276', 'P22303', 'P54132', 'Q16637', 'Q16665']	cholinesterase inhibitor	ACHE, BCHE	cardiology, neurology/psychiatry, ophthalmology, gastroenterology	hypotension, Alzheimer's disease, glaucoma, gastroparesis	PIJVFDBKTWXHHD-HIFRSBDPSA-N
fluphenazine	['O00255', 'O95069', 'P02545', 'P06241', 'P06280', 'P08172', 'P08173', 'P08183', 'P08913', 'P0DMS8', 'P11229', 'P14416', 'P18089', 'P18825', 'P20309', 'P21728', 'P21917', 'P21918', 'P23975', 'P25021', 'P25100', 'P28223', 'P28335', 'P31645', 'P33032', 'P35367', 'P35462', 'P41595', 'P46063', 'P50406', 'Q01959', 'Q03164', 'Q12809', 'Q16637', 'Q99720']	dopamine receptor antagonist	CALM1, DRD1, DRD2, DRD5, HRH1, HTR2A, HTR6, HTR7	neurology/psychiatry	schizophrenia	PLDUPXSUYLZYBN-UHFFFAOYSA-N
midodrine		adrenergic receptor agonist	ADRA1A, ADRA1B, ADRA1D	cardiology	hypotension	PTKSEFOSCHHMPD-UHFFFAOYSA-N
nitrendipine	['O75496', 'P02545', 'P0DMS8', 'Q12809', 'Q13936']	calcium channel blocker	CACNA1C, CACNA1D, CACNA1H, CACNA1S, CACNA2D1, CACNA2D2, CACNB2, CACNG1, KCNN4	cardiology	hypertension	PVHUJELLJLJGLN-UHFFFAOYSA-N
niacin	['P10253', 'Q8TDS4']	NAD precursor, vitamin B	DGAT2, HCAR1, HCAR2, HCAR3, NNMT, QPRT	endocrinology	hypertriglyceridemia	PVNIIMVLHYAWGP-UHFFFAOYSA-N
milrinone	['O76074', 'P16473', 'P23219', 'P54132', 'Q13370', 'Q14432']	phosphodiesterase inhibitor	PDE2A, PDE3A, PDE3B, PDE5A	cardiology	congestive heart failure	PZRHRDRVRGEVNW-UHFFFAOYSA-N
caffeic-acid	['B2RXH2', 'O00255', 'O43570', 'P00915', 'P00918', 'P02545', 'P03956', 'P07451', 'P08253', 'P14780', 'P18031', 'P19838', 'P22748', 'P23280', 'P35218', 'P43166', 'Q03164', 'Q16790', 'Q99714', 'Q9NUW8', 'Q9ULX7', 'Q9Y2D0']	HIV integrase inhibitor, lipoxygenase inhibitor, nitric oxide production inhibitor, tumor necrosis factor production inhibitor	ALOX5, MIF			QAIPRVGONGVQAS-DUXPYHPUSA-N
gossypol	['B2RXH2', 'O75604', 'P00338', 'P02545', 'P03372', 'P06746', 'P07195', 'P10415', 'P15121', 'P16050', 'P18054', 'P29372', 'P55072', 'Q07817', 'Q07820', 'Q16665', 'Q99714']	BCL inhibitor, MCL1 inhibitor	BCL2			QBKSWRVVCFFDOT-UHFFFAOYSA-N
reserpine	['P08183', 'P28482', 'P29466', 'P35372', 'P55210', 'Q6W5P4']	vesicular monoamine transporter inhibitor	SLC18A1, SLC18A2	cardiology	hypertension	QEVHRUUCFGRFIF-MDEJGZGSSA-N
fluspirilene	['O00255', 'O75604', 'P02545', 'P10253', 'P17861', 'P19838', 'P23415', 'P41146', 'P41595', 'P50406', 'Q03164', 'Q12809', 'Q6W5P4']	dopamine receptor antagonist	CACNG1, DRD2, HRH1, HTR1A, HTR1D, HTR1E, HTR2A	neurology/psychiatry	schizophrenia	QOYHHIBFXOOADH-UHFFFAOYSA-N
maprotiline	['P08172', 'P08173', 'P08912', 'P08913', 'P10253', 'P11229', 'P14416', 'P18089', 'P18825', 'P20309', 'P21728', 'P21918', 'P23975', 'P25021', 'P25100', 'P28223', 'P28335', 'P28482', 'P35367', 'P35462', 'P41595', 'P42345', 'P50406', 'Q01959']	norepinephrine reputake inhibitor, tricyclic antidepressant	ADRA1A, ADRA1B, ADRA1D, ADRA2A, ADRA2B, ADRA2C, CHRM1, CHRM2, CHRM3, CHRM4, CHRM5, DRD2, HRH1, HTR2A, HTR2C, HTR7, SLC6A2	neurology/psychiatry	depression, dysthymic disorder	QSLMDECMDJKHMQ-UHFFFAOYSA-N
rimexolone		glucocorticoid receptor agonist	NR3C1, SERPINA6	ophthalmology	anterior uveitis	QTTRZHGPGKRAFB-OOKHYKNYSA-N
orphenadrine	['P02545', 'P08172', 'P08173', 'P08912', 'P08913', 'P11229', 'P18089', 'P20309', 'P23975', 'P25021', 'P28223', 'P28335', 'P31645', 'P35367', 'P41595', 'P50406', 'Q12809', 'Q6W5P4']	acetylcholine receptor antagonist	GRIN1, GRIN2D, GRIN3A, GRIN3B, HRH1, SCN10A, SLC6A2	neurology/psychiatry	muscle pain	QVYRGXJJSLMXQH-UHFFFAOYSA-N
buspirone	['P00352', 'P08908', 'P14416', 'P25100', 'P28223', 'P28335', 'P35462', 'P41595', 'Q12809', 'Q96FL8', 'Q99720']	serotonin receptor agonist	DRD2, HTR1A	neurology/psychiatry	generalized anxiety disorder (GAD)	QWCRAEMEVRGPNT-UHFFFAOYSA-N
cefaclor	['Q9GZU7']	bacterial cell wall synthesis inhibitor		infectious disease, otolaryngology	pneumonia, skin infections, urinary tract infections, respiratory tract infections, tonsillitis, pharyngitis	QYIYFLOTGYLRGG-GPCCPHFNSA-N
phenoxybenzamine	['O15244', 'O15245', 'O75751', 'P02545', 'P16473', 'Q16637', 'Q16665']	adrenergic receptor antagonist	ADRA1A, ADRA1B, ADRA1D, ADRA2A, ADRA2B, ADRA2C, ADRB2, CALM1	cardiology, endocrinology	hypertension, pheochromocytoma	QZVCTJOXCFMACW-UHFFFAOYSA-N
diethylcarbamazine	['P00352', 'P10636', 'P16050', 'P16473']	lipoxygenase inhibitor	ALOX5, PTGS1	infectious disease	filariasis	RCKMWOKWVGPNJF-UHFFFAOYSA-N
quercetin	['B2RXH2', 'O43570', 'O60285', 'P00533', 'P00734', 'P00915', 'P00918', 'P04054', 'P04637', 'P05164', 'P06493', 'P06737', 'P06746', 'P07451', 'P08069', 'P08253', 'P08254', 'P08581', 'P09917', 'P10253', 'P10636', 'P11309', 'P12931', 'P14780', 'P15121', 'P16050', 'P18054', 'P19784', 'P19838', 'P21397', 'P21917', 'P22748', 'P23280', 'P25024', 'P27986', 'P30530', 'P31749', 'P33527', 'P35218', 'P35968'…	polar auxin transport inhibitor	ATP5A1, ATP5B, ATP5C1, HCK, HIBCH, PIK3CG, PIM1, STK17B, UGT3A1	neurology/psychiatry, allergy	fatigue, allergic rhinitis, drowsiness	REFJWTPEDVJJIY-UHFFFAOYSA-N
procainamide	['P02545', 'P22303', 'P54132']	sodium channel blocker	DNMT1, SCN5A	cardiology	ventricular arrhythmias, ventricular tachycardia (VT)	REQCZEXYDRLIBE-UHFFFAOYSA-N
zaprinast	['O43924', 'O75604', 'O76074', 'P02545', 'P10636', 'P15428', 'P16499', 'P18545', 'P35913', 'P51160', 'P54750', 'Q01064', 'Q08499', 'Q13956', 'Q14123', 'Q16665', 'Q9HC97']	phosphodiesterase inhibitor	GPR35, PDE1A, PDE4D, PDE5A, PDE9A			REZGGXNDEMKIQB-UHFFFAOYSA-N
diethylstilbestrol	['O00255', 'P03372', 'P04150', 'P08913', 'P0DMS8', 'P11229', 'P14416', 'P18089', 'P18825', 'P20309', 'P21452', 'P21728', 'P23219', 'P23975', 'P24557', 'P25100', 'P28223', 'P28482', 'P29274', 'P30542', 'P31645', 'P35372', 'P35462', 'P41143', 'P41145', 'P41595', 'P50406', 'P62508', 'Q01959', 'Q03164', 'Q92731', 'Q9UNQ0']	estrogen receptor agonist	ESR1, ESR2, ESRRB, ESRRG			RGLYKWWBQGJZGM-ISLYRVAYSA-N
nefopam	['Q9NUW8']	cyclooxygenase inhibitor		neurology/psychiatry	pain relief	RGPDEAGGEXEMMM-UHFFFAOYSA-N
epirizole	[]	cyclooxygenase inhibitor	PTGS1, PTGS2	neurology/psychiatry	pain relief	RHAXSHUQNIEUEY-UHFFFAOYSA-N
droperidol	['P08173', 'P08912', 'P08913', 'P14416', 'P18089', 'P18825', 'P21728', 'P25100', 'P28223', 'P28335', 'P28482', 'P35367', 'P35462', 'P41595', 'Q12809', 'Q16665']	dopamine receptor antagonist	ADRA1A, DRD2, DRD3, DRD4, HTR2A	gastroenterology	nausea, vomiting	RMEDXOLNCUSCGS-UHFFFAOYSA-N
pirenzepine	['P02545', 'P08172', 'P08173', 'P08912', 'P0DMS8', 'P11229', 'P20309']	acetylcholine receptor antagonist	CHRM1, CHRM2, CHRM3, CHRM4, CHRM5	gastroenterology	peptic ulcer disease (PUD)	RMHMFHUVIITRHF-UHFFFAOYSA-N
phenelzine	['P02545', 'P16473', 'P19838', 'P21397', 'P27338', 'P54132', 'P55789', 'Q16853']	monoamine oxidase inhibitor	ABAT, AOC3, GAD2, GPT, GPT2, MAOA, MAOB, SLC6A2, SLC6A3, SLC6A4	neurology/psychiatry	depression	RMUCZJUITONUFY-UHFFFAOYSA-N
fluoxetine	['P02545', 'P08912', 'P08913', 'P11229', 'P15428', 'P18089', 'P20309', 'P22303', 'P23975', 'P28223', 'P28335', 'P31645', 'P50406', 'Q01959', 'Q12809', 'Q13936', 'Q99720', 'Q9Y5N1']	selective serotonin reuptake inhibitor (SSRI)	ANO1, HTR2B, SLC6A4	neurology/psychiatry	depression, obsessive compulsive disorder (OCD), bulimia nervosa, panic disorders, bipolar disorder	RTHCYVBBDHJXIQ-UHFFFAOYSA-N
chenodeoxycholic-acid	['Q12908', 'Q8TDU6']	11-beta hydroxysteroid dehydrogenase inhibitor, FXR agonist	HSD11B1, NR1H4	cardiology, gastroenterology	cerebral cholesterosis, gallstones	RUDATBOHQWOJDD-BSWAIDMHSA-N
vincamine		adrenergic receptor antagonist	CHRM1, CHRM2, CHRM3, CHRM4			RXPRRQLKFXBCSJ-HLAWJBBLSA-N
mephentermine	['P02545']	adrenergic receptor agonist	ADRA1A, ADRA1B, ADRA1D, ADRA2A, ADRA2B, ADRA2C, ADRB1, ADRB2, ADRB3	cardiology	hypotension	RXQCGGRTAILOIN-UHFFFAOYSA-N
simvastatin	['P04035', 'Q9Y6L6']	HMGCR inhibitor	HMGCR, ITGB2	endocrinology, cardiology, neurology/psychiatry	hypercholesterolemia, coronary heart disease, myocardial infarction, stroke, hyperlipidemia	RYMZZMVNJRMUDD-HGQWONQESA-N
felodipine	['P0DMS8', 'Q96RI1']	calcium channel blocker	CACNA1C, CACNA1D, CACNA1F, CACNA1H, CACNA1S, CACNA2D1, CACNA2D2, CACNB2, CALM1, CFTR, NR3C2, PDE1A, PDE1B, TNNC1, TNNC2	cardiology	hypertension	RZTAMFZIAATZDJ-UHFFFAOYSA-N
meclofenamic-acid	['O75604', 'P02766', 'P10828', 'P12104', 'P19838', 'P23219', 'P28482', 'P35354', 'P42330', 'P52895', 'P54132', 'Q04828', 'Q16665']	cyclooxygenase inhibitor, prostanoid receptor antagonist	ALOX5, CNR1, KCNQ2, KCNQ3, PTGS1, PTGS2	rheumatology, neurology/psychiatry, endocrinology	joint pain, muscle pain, rheumatoid arthritis, primary dysmenorrhea (PD)	SBDNJUWAMKYJOX-UHFFFAOYSA-N
labetalol	['P02545', 'P07550', 'P08588', 'P10253', 'P23975', 'P25100', 'P41595', 'Q01959', 'Q16637', 'Q99720']	adrenergic receptor antagonist	ADRA1A, ADRA1B, ADRA1D, ADRB1, ADRB2	cardiology	hypertension	SGUAFYQXFOLMHL-UHFFFAOYSA-N
isotretinoin	['P0DMS8', 'P18089', 'P28482', 'P41595', 'P42345', 'Q01453', 'Q16539']	retinoid receptor agonist	RARA, RARB, RARG	dermatology	acne vulgaris (AV)	SHGAZHPCJJPHSC-XFYACQKRSA-N
digoxigenin	['O15118', 'P04637', 'P51151', 'Q06710', 'Q6ZQN7']	steroid				SHIBSTMRCDJXLN-KCZCNTNESA-N
ozagrel	['P24557']	thromboxane synthase inhibitor	TBXAS1	neurology/psychiatry	stroke	SHZKQBHERIJWAO-AATRIKPKSA-N
cyclopentolate	['P02545', 'Q16637']	acetylcholine receptor antagonist	CHRM1	ophthalmology	mydriasis, cycloplegia	SKYSRIRYMSLOIN-UHFFFAOYSA-N
skimmianine	['P02545', 'P16473', 'Q99714']					SLSIBLKBHNKZTB-UHFFFAOYSA-N
mesoridazine	['Q12809']	dopamine receptor antagonist	DRD2, HTR2A	neurology/psychiatry	schizophrenia	SLVMESMUVMCQIY-UHFFFAOYSA-N
bupropion	['P02708', 'P07510', 'P08648', 'P11230', 'P17787', 'P23975', 'P30926', 'P32297', 'P43681', 'Q01959', 'Q07001']	dopamine uptake inhibitor	CHRNA3, SLC6A2, SLC6A3	neurology/psychiatry	depression	SNPPWIUOZRMYNY-UHFFFAOYSA-N
proadifen	['P02545', 'P19838', 'Q6W5P4', 'Q99720']	nitric oxide synthase inhibitor	NOS1			SNTQPLDRUZOSDP-UHFFFAOYSA-N
chlorphenamine	['P02545', 'P35367', 'Q12809']	histamine receptor antagonist	HRH1, SLC6A2, SLC6A3, SLC6A4	allergy	allergic rhinitis, urticaria	SOYKEARSMXGVTM-UHFFFAOYSA-N
flavoxate	['P02545']	acetylcholine receptor antagonist	CHRM1, CHRM2	urology	urinary incontinence, interstitial cystitis (IC), urethritis, prostatitis	SPIUTQOUKAMGCX-UHFFFAOYSA-N
omeprazole	['P14618', 'P20648', 'P49327', 'P51164', 'Q07820', 'Q16637']	ATPase inhibitor	ATP4A, CLCN2	gastroenterology	heartburn	SUBDBMMJDZJVOS-UHFFFAOYSA-N
pirinixic-acid	['Q03181', 'Q07869']	PPAR receptor agonist	PPARA			SZRPDCCEHVWOJX-UHFFFAOYSA-N
metoclopramide	['P02545', 'P08913', 'P14416', 'P28223', 'P28335', 'P35462', 'P41595', 'P51151', 'Q13639']	dopamine receptor antagonist, serotonin receptor antagonist	CHRM1, DRD2, HTR3A, HTR3B, HTR4	gastroenterology	gastroparesis, nausea, vomiting	TTWJBBZEZQICBI-UHFFFAOYSA-N
mafenide	['B2RXH2', 'O43570', 'P00915', 'P00918', 'P22748', 'P23280', 'P43166', 'Q16637', 'Q16790', 'Q9ULX7']	carbonic anhydrase inhibitor	CA12, CA14, CA2, CA4, CA6, CA9	infectious disease	first-aid antibiotic, skin infections	TYMRLRRVMHJFTF-UHFFFAOYSA-N
mianserin	['P02545', 'P08172', 'P08173', 'P08908', 'P08912', 'P08913', 'P11229', 'P14416', 'P18089', 'P18825', 'P20309', 'P21728', 'P21917', 'P23975', 'P25021', 'P25100', 'P28221', 'P28223', 'P28335', 'P31645', 'P34969', 'P35348', 'P35367', 'P35462', 'P41595', 'P50406']	serotonin receptor antagonist	ADRA1A, ADRA1B, ADRA1D, ADRA2A, ADRA2B, ADRA2C, DRD1, DRD2, DRD3, DRD5, HRH1, HRH2, HRH4, HTR1A, HTR1F, HTR2A, HTR2B, HTR2C, HTR6, HTR7, OPRK1, SLC6A2, SLC6A3, SLC6A4	neurology/psychiatry	depression	UEQUQVLFIPOEMF-UHFFFAOYSA-N
nimodipine	['O75469', 'P02545', 'P0DMS8', 'P21554', 'Q13936', 'Q6W5P4', 'Q96RI1']	calcium channel blocker	AHR, CACNA1C, CACNA1D, CACNA1F, CACNA1S, CACNB1, CACNB2, CACNB3, CACNB4, CFTR, NR3C2	hematology	hemorrhage	UIAGMCDKSXEBJQ-UHFFFAOYSA-N
bepridil	['O00255', 'P02545', 'Q03164', 'Q12809', 'Q13936', 'Q14524', 'Q6W5P4']	calcium channel blocker	ATP1A1, CACNA1A, CACNA1H, CACNA2D2, CALM1, KCNQ1, KCNQ4, PDE1A, PDE1B, TNNC1	cardiology	angina pectoris	UIEATEWHFDRYRU-UHFFFAOYSA-N
piretanide	['O75604', 'P00352', 'P02545', 'Q16665']	glucocorticoid receptor agonist	SLC12A1, SLC12A2	cardiology	hypertension, edema	UJEWTUDSLQGTOA-UHFFFAOYSA-N
tolmetin	['P10145', 'P15121', 'P23219']	cyclooxygenase inhibitor	PTGS1, PTGS2	rheumatology	rheumatoid arthritis, osteoarthritis	UPSPUYADGBWSHF-UHFFFAOYSA-N
betahistine	['P02545', 'Q96RJ0', 'Q9NUW8']	histamine receptor agonist, histamine receptor antagonist	HRH1, HRH3	neurology/psychiatry	Meniere's disease	UUQMNUMQCIQDMZ-UHFFFAOYSA-N
altretamine	['P02545', 'P10828', 'Q99714']	DNA synthesis inhibitor		oncology	ovarian cancer	UUVWYPNAQBNQJQ-UHFFFAOYSA-N
disopyramide	['P10828', 'P54132']	sodium channel blocker	CHRM1, CHRM2, CHRM3, KCND2, KCND3, KCNH2, SCN5A	cardiology	ventricular tachycardia (VT), ventricular arrhythmias	UVTNFZQICZKOEM-UHFFFAOYSA-N
terazosin	['P02545', 'P08913', 'P18089', 'P18825', 'P25100', 'P35348', 'P35368', 'P42858', 'Q16637']	adrenergic receptor antagonist	ADRA1A, ADRA1B, ADRA1D, KCNH2, KCNH6, KCNH7	urology, cardiology	benign prostatic hyperplasia (BPH), hypertension	VCKUSRYTPJJLNI-UHFFFAOYSA-N
phenazone		cyclooxygenase inhibitor	PTGS1, PTGS2	neurology/psychiatry	pain relief	VEQOALNAAJBPNY-UHFFFAOYSA-N
leflunomide	['O15118', 'O75496', 'P02545', 'P04637', 'P23975', 'P40225', 'P42858', 'P51151', 'Q01959', 'Q6W5P4']	dihydroorotate dehydrogenase inhibitor, PDGFR tyrosine kinase receptor inhibitor	AHR, DHODH, PTK2B	rheumatology	rheumatoid arthritis	VHOGYURTWQBHIL-UHFFFAOYSA-N
bisoprolol	['P02545', 'P18054', 'P19838', 'P28482']	adrenergic receptor antagonist	ADRB1, ADRB2	cardiology	hypertension	VHYCDWMUTMEGQY-UHFFFAOYSA-N
mexiletine	['P02545', 'P41595', 'Q12809', 'Q99250']	sodium channel blocker	AHR, SCN4A, SCN5A	cardiology	ventricular arrhythmias, ventricular tachycardia (VT)	VLPIATFUUWWMKC-UHFFFAOYSA-N
ranitidine	['P54132']	histamine receptor antagonist	HRH2	gastroenterology	heartburn	VMXUWOKSQNHOCA-UKTHLTGXSA-N
budesonide	['P04150', 'P14780', 'P19838', 'P40225', 'Q16637']	glucocorticoid receptor agonist	NR3C1	gastroenterology	Crohn's disease	VOVIALXJUBGFJZ-KWVAZRHASA-N
BRD-K81807412	['P0DMS8', 'P30542']					VQAYFKKCNSOZKM-IOSLPCCCSA-N
levomepromazine		dopamine receptor antagonist	ADRA1A, ADRA1B, ADRA1D, ADRA2A, ADRA2B, ADRA2C, CHRM1, CHRM2, CHRM3, CHRM4, CHRM5, DRD1, DRD2, DRD3, DRD4, DRD5, HRH1, HTR2A, HTR2C	neurology/psychiatry, gastroenterology	psychosis, schizophrenia, bipolar disorder, nausea, insomnia	VRQVVMDWGGWHTJ-CQSZACIVSA-N
camptothecin	['B2RXH2', 'O14757', 'O75496', 'P02545', 'P04637', 'P06280', 'P09651', 'P11387', 'P15428', 'P19838', 'P30872', 'P30874', 'P31391', 'P32745', 'P35346', 'P40225', 'P41595', 'P42345', 'P42858', 'P51151', 'P68871', 'Q01453', 'Q16637', 'Q16665', 'Q99714']	topoisomerase inhibitor	TOP1			VSJKWCGYPAHWDS-FQEVSTJZSA-N
telenzepine	['P02545', 'P16473', 'Q9Y468']	acetylcholine receptor antagonist	CHRM1			VSWPGAIWKHPTKX-UHFFFAOYSA-N
nadolol	['P46063']	adrenergic receptor antagonist	ADRB1, ADRB2, ADRB3	cardiology	angina pectoris, hypertension	VWPOSFSPZNDTMJ-UCWKZMIHSA-N
meprylcaine	['Q9NUW8']	local anesthetic				VXJABHHJLXLNMP-UHFFFAOYSA-N
mebeverine	['P02545']	acetylcholine receptor antagonist	CHRM1	gastroenterology	irritable bowel syndrome	VYVKHNNGDFVQGA-UHFFFAOYSA-N
thioproperazine	['P02545']	dopamine receptor antagonist	ADRA1A, ADRA1B, DRD1, DRD2, HTR1A, HTR2A	neurology/psychiatry	schizophrenia	VZYCZNZBPPHOFY-UHFFFAOYSA-N
vorinostat	['O15379', 'O75376', 'P51843', 'P56524', 'Q06710', 'Q13547', 'Q8WUI4', 'Q92769', 'Q969S8', 'Q96DB2', 'Q9BY41', 'Q9UBN7', 'Q9UKV0', 'Q9UQL6', 'Q9Y618']	HDAC inhibitor	HDAC1, HDAC10, HDAC11, HDAC2, HDAC3, HDAC5, HDAC6, HDAC8, HDAC9	hematologic malignancy	cutaneous T-cell lymphoma (CTCL)	WAEXFXRVDQXREF-UHFFFAOYSA-N
benzbromarone	['O75604', 'P02545', 'P0DMS8', 'P16473', 'P28482', 'P33527', 'P37231', 'P41595', 'Q04828', 'Q16539', 'Q16665', 'Q4U2R8', 'Q96S37', 'Q9Y618']	chloride channel blocker	ABCC1	rheumatology	gout	WHQCHUCQKNIQEC-UHFFFAOYSA-N
chloroquine	['P04156', 'P10636', 'P16083', 'Q12809']	antimalarial agent	GSTA2, MRGPRX1, TLR9, TNF	infectious disease	malaria, amebiasis	WHTVZRBIWZFKQO-UHFFFAOYSA-N
prochlorperazine	['P02545', 'P06241', 'P08172', 'P08173', 'P08912', 'P08913', 'P11229', 'P14416', 'P16473', 'P18089', 'P18825', 'P20309', 'P21728', 'P21917', 'P23975', 'P25100', 'P28223', 'P28335', 'P31645', 'P35367', 'P35462', 'P41595', 'P50406', 'Q01959', 'Q07820', 'Q12809', 'Q16637', 'Q99720']	dopamine receptor antagonist	DRD1, DRD2, DRD3, DRD4	gastroenterology	nausea, vomiting	WIKYUJGCLQQFNW-UHFFFAOYSA-N
tiabendazole	['O15118', 'P51151', 'Q16665']	angiogenesis inhibitor		infectious disease	gastrointestinal roundworms, hookworm	WJCNZQLZVWNLKY-UHFFFAOYSA-N
etifenin	['P16050', 'Q16665']	renal function diagnostic agent				WNIDXAKKFOKNEF-UHFFFAOYSA-N
alfuzosin	['P25100', 'P35348', 'P35368']	adrenergic receptor antagonist	ADRA1A, ADRA1B, ADRA1D, KCNH2	urology	benign prostatic hyperplasia (BPH)	WNMJYKCGWZFFKR-UHFFFAOYSA-N
moxonidine	['P02545', 'P08913', 'P18089', 'P18825', 'Q9Y2I1']	imidazoline receptor agonist	ADRA2A, ADRA2B, ADRA2C	cardiology	hypertension	WPNJAUFVNXKLIM-UHFFFAOYSA-N
citalopram	['P23975', 'P25100', 'P28335', 'P28482', 'P31645', 'P35367', 'P41595', 'Q12809', 'Q16637', 'Q99720']	selective serotonin reuptake inhibitor (SSRI)	SLC6A2, SLC6A4	neurology/psychiatry	depression	WSEQXVZVJXJVFP-UHFFFAOYSA-N
levonorgestrel		estrogen receptor agonist, glucocorticoid receptor antagonist, progesterone receptor agonist, progesterone receptor antagonist	AR, ESR1, PGR, SRD5A1	endocrinology	contraceptive	WWYNJERNGUHSAO-XUDSTZEESA-N
oxymetazoline	['P02545', 'P08173', 'P08908', 'P08912', 'P08913', 'P18089', 'P18825', 'P25100', 'P28221', 'P28222', 'P28223', 'P28335', 'P35348', 'P35368', 'P41595', 'P50406', 'P51151', 'P54132', 'Q6W5P4', 'Q9Y2I1']	adrenergic receptor agonist	ADRA1A, ADRA1B, ADRA1D, ADRA2A, ADRA2B, ADRA2C, HTR1B, HTR1D, HTR2C	otolaryngology	nasal congestion	WYWIFABBXFUGLM-UHFFFAOYSA-N
thiethylperazine	['P02545', 'P55789']	dopamine receptor antagonist	DRD1, DRD2, DRD4	gastroenterology	nausea	XCTYLCDETUVOIP-UHFFFAOYSA-N
norcyclobenzaprine	['P02545']	adrenergic receptor agonist, serotonin receptor antagonist				XECQQDXTQRYYBH-UHFFFAOYSA-N
dinoprostone	['P16473', 'P28482', 'P34995', 'P35408', 'P43088', 'P43115', 'P43116', 'P43119']	prostanoid receptor agonist	CATSPER1, CATSPER2, CATSPER3, CATSPER4, PTGDR, PTGDR2, PTGER1, PTGER2, PTGER3, PTGER4, PTGFR, TBXA2R			XEYBRNLFEZDVAW-ARSRFYASSA-N
loxapine	['P02545', 'P11229', 'P14416', 'P21917', 'P28223', 'P35462', 'P50406', 'P54132', 'Q16637', 'Q9H3N8']	dopamine receptor antagonist, serotonin receptor antagonist	ADRA1A, ADRA1B, ADRA2A, ADRA2B, ADRA2C, ADRB1, CHRM1, CHRM2, CHRM3, CHRM4, CHRM5, DRD1, DRD2, DRD3, DRD4, DRD5, HRH1, HRH2, HRH4, HTR1A, HTR1B, HTR1D, HTR1E, HTR2A, HTR2C, HTR3A, HTR5A, HTR6, HTR7, SLC6A2, SLC6A3, SLC6A4	neurology/psychiatry	schizophrenia	XJGVXQDUIWGIRW-UHFFFAOYSA-N
isocarboxazid	['P02545']	monoamine oxidase inhibitor	MAOA, MAOB	neurology/psychiatry	depression	XKFPYPQQHFEXRZ-UHFFFAOYSA-N
sulmazole	['P02545']	adenosine receptor antagonist				XMFCOYRWYYXZMY-UHFFFAOYSA-N
quinisocaine	['P02545', 'Q9NUW8']					XNMYNYSCEJBRPZ-UHFFFAOYSA-N
papaverine	['O00408', 'O76074', 'P00352', 'P02545', 'P06280', 'P16473', 'P18054', 'P19838', 'P27815', 'P28482', 'P54132', 'P54750', 'Q01064', 'Q07343', 'Q08493', 'Q08499', 'Q12809', 'Q13370', 'Q14123', 'Q14432', 'Q16637', 'Q16665', 'Q92793', 'Q9Y233']	phosphodiesterase inhibitor	PDE10A, PDE4B, PDE5A	cardiology, hematology, gastroenterology	myocardial infarction, angina pectoris, pulmonary embolism (PE), colitis, vascular spasm	XQYZDYMELSJDRZ-UHFFFAOYSA-N
quipazine	['O75604', 'P08588', 'P08908', 'P28335', 'P28482', 'P31645', 'P34969', 'P46098', 'P50406', 'Q9NUW8']	serotonin receptor agonist				XRXDAJYKGWNHTQ-UHFFFAOYSA-N
triflupromazine	['O00255', 'Q03164']	dopamine receptor antagonist	CHRM1, CHRM2, DRD1, DRD2, HTR2B	neurology/psychiatry, gastroenterology	psychosis, nausea, vomiting	XSCGXQMFQXDFCW-UHFFFAOYSA-N
azaperone	['P02545', 'P14416', 'P35462', 'Q99720']	dopamine receptor antagonist	DRD2, DRD3	neurology/psychiatry	sedative	XTKDAFGWCDAMPY-UHFFFAOYSA-N
nilutamide	['P02545', 'P10275', 'P16473', 'P18054', 'P19838']	androgen receptor antagonist	AR	oncology	prostate cancer	XWXYUMMDTVBTOU-UHFFFAOYSA-N
rosiglitazone	['O95342', 'P00918', 'P02545', 'P13631', 'P24557', 'P27338', 'P37231', 'Q03181', 'Q07869', 'Q9NZ45']	insulin sensitizer, PPAR receptor agonist	ACSL4, FFAR1, PPARG, TRPC5, TRPM3			YASAKCUCGLMORW-UHFFFAOYSA-N
ergocryptine	['P08183', 'P08913', 'P13945', 'P14416', 'P18089', 'P18825', 'P21728', 'P25100', 'P28223', 'P28335', 'P35372', 'P35462', 'P41595', 'P50406', 'Q99714']					YDOTUXAWKBPQJW-NSLWYYNWSA-N
mepyramine	['P02545', 'P08913', 'P0DMS8', 'P28223', 'P28335', 'P31645', 'P35367', 'P41595', 'Q01959', 'Q12809', 'Q16637', 'Q99720']	histamine receptor antagonist	HRH1	otolaryngology, obstetrics/gynecology	common cold, menstrual pain	YECBIJXISLIIDS-UHFFFAOYSA-N
pergolide	['P08908', 'P08913', 'P14416', 'P18089', 'P18825', 'P21728', 'P25100', 'P28223', 'P28335', 'P35462', 'P41595', 'P50406', 'P54132', 'Q12809']	dopamine receptor agonist	ADRA1A, ADRA1B, ADRA1D, ADRA2A, ADRA2B, ADRA2C, DRD1, DRD2, DRD3, DRD4, DRD5, HTR1A, HTR1B, HTR1D, HTR2A, HTR2B, HTR2C			YEHCICAEULNIGD-MZMPZRCHSA-N
zoxazolamine	['P02545', 'P16050']	myorelaxant				YGCODSQDUUUKIV-UHFFFAOYSA-N
podophyllotoxin	['O15118', 'P02545', 'P04150', 'P04350', 'P07437', 'P51151', 'P51843', 'P68363', 'P68366', 'P68371', 'Q13509', 'Q13748', 'Q13885', 'Q16637', 'Q16665', 'Q3ZCM7', 'Q6PEY2', 'Q71U36', 'Q9BQE3', 'Q9BUF5', 'Q9BVA1', 'Q9H4B7']	microtubule inhibitor, tubulin polymerization inhibitor	IGF1R, TOP2A, TUBA4A, TUBB	infectious disease	genital warts	YJGVMLPVUAXIQN-XVVDYKMHSA-N
gabexate	['O15244', 'P00734', 'P00742', 'P00747', 'P00749', 'P03952', 'Q96FL8']	serine protease inhibitor	PRSS1, TPSAB1	gastroenterology	pancreatitis	YKGYIDJEEQRWQH-UHFFFAOYSA-N
synephrine	['P40225', 'P54132', 'Q16637', 'Q9GZQ4', 'Q9NUW8']	adrenergic receptor agonist	ADRA1A			YRCWQPVGYLYSOX-UHFFFAOYSA-N
nicergoline	['Q9NUW8']	adrenergic receptor antagonist	ADRA1A	rheumatology, neurology/psychiatry, cardiology, hematology	Raynaud's disease, migraine headache, atherosclerosis, thrombosis, Raynaud's disease, migraine headache, atherosclerosis, thrombosis	YSEXMKHXIOCEJA-FVFQAYNVSA-N
biperiden		acetylcholine receptor antagonist	CHRM1, CHRM2, CHRM3, CHRM4, CHRM5, CHRNA2	neurology/psychiatry	Parkinson's Disease	YSXKPIUOCJLQIE-UHFFFAOYSA-N
pimozide	['O00255', 'O43497', 'O75604', 'O94782', 'O95069', 'P08183', 'P14416', 'P23415', 'P28482', 'P35372', 'P40225', 'P41143', 'P41145', 'P50406', 'Q03164', 'Q12809', 'Q16665', 'Q6W5P4', 'Q8TAF3', 'Q9NUW8']	dopamine receptor antagonist	CACNA1I, CALM1, DRD1, DRD2, DRD3, DRD4, DRD5, HRH1, HTR1A, HTR2A, KCNA10, KCNH2	neurology/psychiatry	Tourette's disorder	YVUQSNJEYSNKRX-UHFFFAOYSA-N
nicardipine	['P02545', 'P08183', 'P0DMS8', 'Q13936', 'Q6W5P4']	calcium channel blocker	ADORA3, ADRA1A, ADRA1B, ADRA1D, CACNA1C, CACNA1D, CACNA2D1, CACNB2, CALM1, CHRM1, CHRM2, CHRM3, CHRM4, CHRM5, PDE1A, PDE1B	cardiology	chronic stable angina, hypertension	ZBBHBTPTTSWHBA-UHFFFAOYSA-N
lidoflazine	['O00255', 'O75604', 'P02545', 'Q03164', 'Q12809', 'Q99808']	calcium channel blocker	SCN1A, SCN3A, SLC29A1			ZBIAKUMOEKILTF-UHFFFAOYSA-N
ketotifen	['P02545', 'P08172', 'P08173', 'P08912', 'P08913', 'P11229', 'P16473', 'P18089', 'P20309', 'P21728', 'P25021', 'P25100', 'P28223', 'P28335', 'P28482', 'P35367', 'P35462', 'P41595', 'P50406', 'Q6W5P4']	histamine receptor agonist, leukotriene receptor antagonist, phosphodiesterase inhibitor	HRH1, PDE4A, PDE4B, PDE4C, PDE4D, PDE7A, PDE7B, PDE8A, PDE8B, PGD	neurology/psychiatry	itching	ZCVMWBYGMWKGHF-UHFFFAOYSA-N
brompheniramine	['Q12809']	histamine receptor antagonist	CHRM1, CHRM2, CHRM3, CHRM4, CHRM5, HRH1	allergy, otolaryngology	allergic rhinitis, common cold	ZDIGNSYAACHWNL-UHFFFAOYSA-N
trifluoperazine	['O00255', 'O94782', 'P06746', 'P08183', 'P0DP23', 'Q03164', 'Q12809', 'Q15125', 'Q8TAF3', 'Q99714', 'Q99720', 'Q9BY08', 'Q9NUW8']	dopamine receptor antagonist	ADRA1A, CALM1, CALY, DRD2, DRD4, HRH1, HTR2A, HTR2C, S100A4, TNNC1	neurology/psychiatry	schizophrenia	ZEWQUBUPAILYHI-UHFFFAOYSA-N
promazine	['P00352', 'P04156', 'P04637', 'P08172', 'P08173', 'P08912', 'P08913', 'P11229', 'P14416', 'P16473', 'P18089', 'P18825', 'P20309', 'P21728', 'P23975', 'P25021', 'P25100', 'P28223', 'P28335', 'P31645', 'P35367', 'P35462', 'P41595', 'P50406', 'P55789', 'Q16637', 'Q16665', 'Q6W5P4', 'Q99720']	dopamine receptor antagonist	ADRA1A, ADRA1B, ADRA1D, CHRM1, CHRM2, CHRM3, CHRM4, CHRM5, DRD1, DRD2, DRD3, DRD4, HRH1, HTR2A, HTR2C	neurology/psychiatry	schizophrenia	ZGUGWUXLJSTTMA-UHFFFAOYSA-N
cetirizine	['P35367']	histamine receptor antagonist	HRH1	allergy	allergic rhinitis	ZKLPARSLTMPFCP-UHFFFAOYSA-N
glibenclamide	['O00255', 'O60706', 'P16473', 'Q03164', 'Q09428', 'Q14654', 'Q16665', 'Q9NZ45']					ZNNLBTZKUZBEKO-UHFFFAOYSA-N
fenbufen	['P02545', 'P51151', 'Q16665']	cyclooxygenase inhibitor	PTGS1, PTGS2			ZPAKPRAICRBAOD-UHFFFAOYSA-N
chlorpromazine	['O00255', 'O95069', 'P02545', 'P04156', 'P06241', 'P08172', 'P08173', 'P08183', 'P08908', 'P08912', 'P08913', 'P0DP23', 'P11229', 'P14416', 'P18089', 'P18825', 'P20309', 'P21728', 'P21917', 'P21918', 'P23975', 'P25021', 'P25100', 'P28223', 'P28335', 'P31645', 'P33032', 'P34969', 'P35367', 'P35372', 'P35462', 'P41145', 'P41595', 'P50406', 'P55789', 'Q01959', 'Q03164', 'Q12809', 'Q16637', 'Q99720']	dopamine receptor antagonist	ADRA1A, ADRA1B, ADRA1D, ADRA2A, ADRA2B, ADRA2C, CALM1, CHRM1, CHRM3, DRD1, DRD2, DRD3, DRD4, DRD5, HRH1, HRH4, HTR1A, HTR2A, HTR2B, HTR2C, HTR6, HTR7, KCNH2, ORM1, ORM2, SMPD1, TRPC5	neurology/psychiatry, gastroenterology, hematology, infectious disease	schizophrenia, nausea, vomiting, acute intermittent porphyria (AIP), tetanus	ZPEIMTDSQAKGNT-UHFFFAOYSA-N
alverine	[]	muscle relaxant	HTR1A	gastroenterology	irritable bowel syndrome, diverticular disease	ZPFXAOWNKLFJDN-UHFFFAOYSA-N
trimipramine	['P46063']	norepinephrine reputake inhibitor, tricyclic antidepressant	ADRA1A, ADRA1B, ADRA2A, ADRA2B, ADRB1, ADRB2, ADRB3, CHRM1, CHRM2, CHRM3, CHRM4, CHRM5, DRD1, DRD2, DRD5, HRH1, HTR1A, HTR1D, HTR2A, HTR2C, HTR3A, SLC6A2, SLC6A3, SLC6A4	neurology/psychiatry	depression	ZSCDBOWYZJWBIY-UHFFFAOYSA-N
